# Supplementary material
Source: MDPI journal article supplement (https://www.mdpi.com/2071-1050/15/3/2633)
Supplement: s1 [file s1 › sustainability-2096594-supplementary.pdf]

## Supplementary Information

Muhammad Nur Aiman Uda <sup>1,2</sup>, Subash C. B. Gopinath <sup>1,3,4,5,\*</sup>, Uda Hashim <sup>1</sup>, Muhammad Nur Afnan Uda <sup>6</sup>, Tijjani Adam <sup>1,4,7</sup>, Nor Azizah Parmin <sup>1</sup>, Sreeramanan Subramaniam <sup>3,5,8,9</sup>, Suresh V. Chinni <sup>10,11</sup>, Veeranjanya Reddy Lebaka <sup>12</sup> and Ramachawolran Gobinath <sup>13,\*</sup>

<sup>1</sup> Institute of Nano Electronic Engineering, Universiti Malaysia Perlis, Kangar 01000, Perlis Malaysia

<sup>2</sup> Faculty of Mechanical Engineering & Technology, Universiti Malaysia Perlis (UniMAP), Arau 02600, Perlis, Malaysia

<sup>3</sup> Faculty of Chemical Engineering & Technology, Universiti Malaysia Perlis (UniMAP), Arau 02600, Perlis, Malaysia

<sup>4</sup> Micro System Technology, Centre of Excellence (CoE), Universiti Malaysia Perlis (UniMAP), Arau 02600, Pauh Campus, Perlis, Malaysia

<sup>5</sup> Centre for Chemical Biology (CCB), Universiti Sains Malaysia, Bayan Lepas 11900, Pulau Pinang, Malaysia

<sup>6</sup> Faculty of Engineering, Universiti Malaysia Sabah, Kota Kinabalu 88400, Sabah, Malaysia

<sup>7</sup> Faculty of Electronic Engineering & Technology, Universiti Malaysia Perlis (UniMAP), Arau 02600, Perlis, Malaysia

<sup>8</sup> School of Biological Sciences, Universiti Sains Malaysia, Georgetown 11800, Pulau Pinang, Malaysia

<sup>9</sup> Department of Biology, Faculty of Science and Technology Universitas Airlangga, Surabaya 60115, Indonesia

<sup>10</sup> Department of Biochemistry, Faculty of Medicine, Bioscience and Nursing, MAHSA University, Jenjarom 42610, Selangor, Malaysia

<sup>11</sup> Department of Periodontics, Saveetha Dental College, and Hospitals, Saveetha Institute of Medical and Technical Sciences, Chennai 602105, India

<sup>12</sup> Department of Microbiology, Yogi Vemana University, Kadapa 516005, Andhra Pradesh, India

<sup>13</sup> Department of Foundation, RCSI & UCD Malaysia Campus, Georgetown 10450, Pulau Pinang, Malaysia

\* Correspondence: subash@unimap.edu.my (S.C.B.G.); r.gobinath@rcsiucd.edu.my (R.G.)

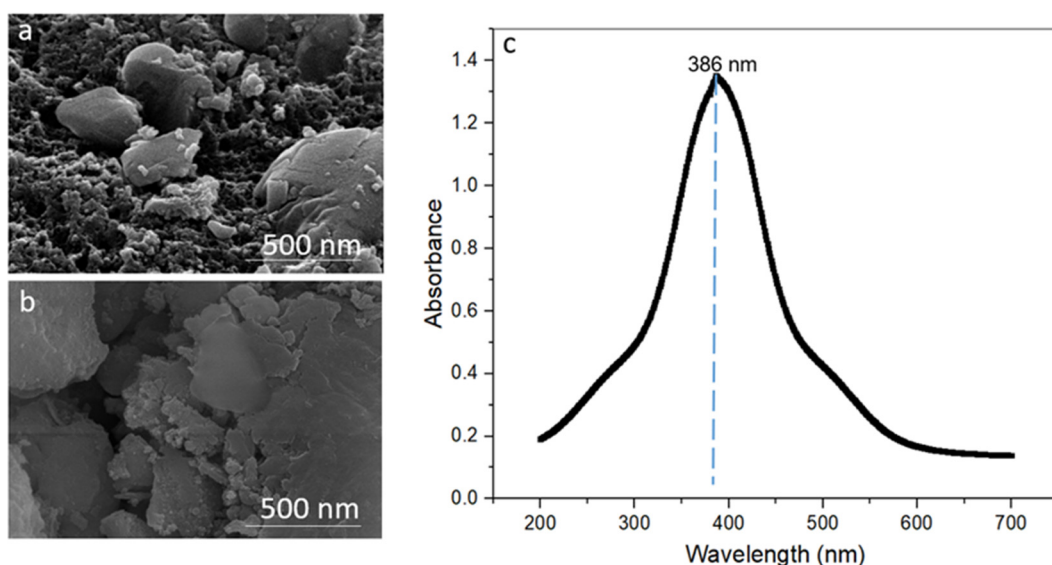

**Figure S1.** Topography images were evaluated using FESEM. (a) silica nanoparticles (b) graphene. (c) Absorption curve for Arsenic (iii). The wavelength range was selected and used for adsorption analysis using UV-Vis measurement.

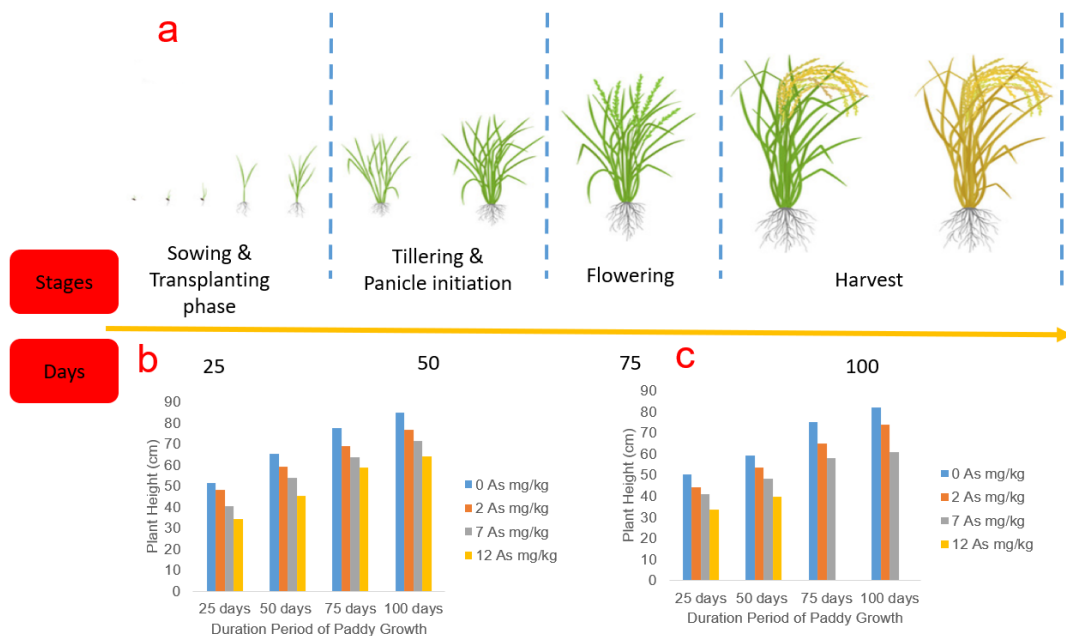

**Figure S2.** (a) In pot experiment analysis MR 220 CL2 was chosen as variety. This variety has maturity period for 100 days before ready for harvesting. Thus, the growth of this variety consists of four important phases which is sowing and transplanting (25 days), tillering and panicle initiation (50 days), Flowering (75 days) and Harvesting (100 days). In this analysis, plant height measurement was taken to determine the correlation between concentration of arsenic applied and treatment with (a) Silica Nanoparticles (b) Graphene.
